# Supplementary material for: Exploring the luminescent and thermometric potentials of samarium(iii) diketonate complexes with extended fluoroalkyl chains
Source: Royal Society of Chemistry journal article supplement (doi:10.1039/d4dt03262d), 2025-01-01
Supplement: d4dt03262d1.pdf [file d4dt03262d1.pdf]

## Supplementary materials

### **Exploring the Luminescent and Thermometric Potentials of Samarium(III) Diketonate Complexes with Extended Fluoroalkyl Chains**

Daria A. Metlina,<sup>\*a</sup> Mikhail T. Metlin,<sup>a,b</sup> Vladislav M. Korshunov,<sup>a,b</sup> Victoria E. Gontcharenko,<sup>a,c</sup> Roman I. Avetisov,<sup>d</sup> Mikhail A. Kiskin,<sup>e</sup> Yuriy A. Belousov<sup>a,f</sup> and Ilya V. Taydakov<sup>a,c</sup>

<sup>a</sup>*P.N. Lebedev Physical Institute of the Russian Academy of Sciences, Leninsky Prospekt 53, 119991 Moscow, Russian Federation.*

<sup>b</sup>*Bauman Moscow State Technical University, 2-ya Baumanskaya str. 5/1, 105005 Moscow, Russian Federation.*

<sup>c</sup>*Faculty of Chemistry, National Research University Higher School of Economics, 20 Miasnitskaya Str., 101000 Moscow, Russia*

<sup>d</sup>*Department of Chemistry and Technology of Crystals, Mendeleev University of Chemical Technology of Russia, 9 Miusskaya Square, Moscow, 125047, Russia*

<sup>e</sup>*N.S. Kurnakov Institute of General and Inorganic Chemistry of the Russian Academy of Sciences, Leninsky Prosp. 31, 119991 Moscow, Russian Federation*

<sup>f</sup>*M.V. Lomonosov Moscow State University, 1 Leninskie Gory Str. Building 3, 119991 Moscow, Russian Federation.*

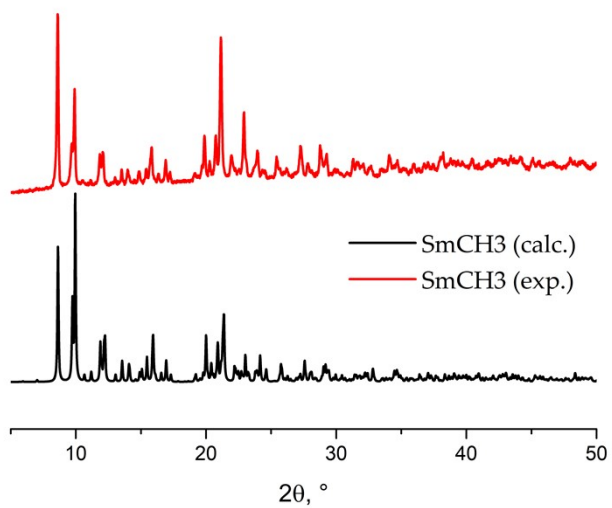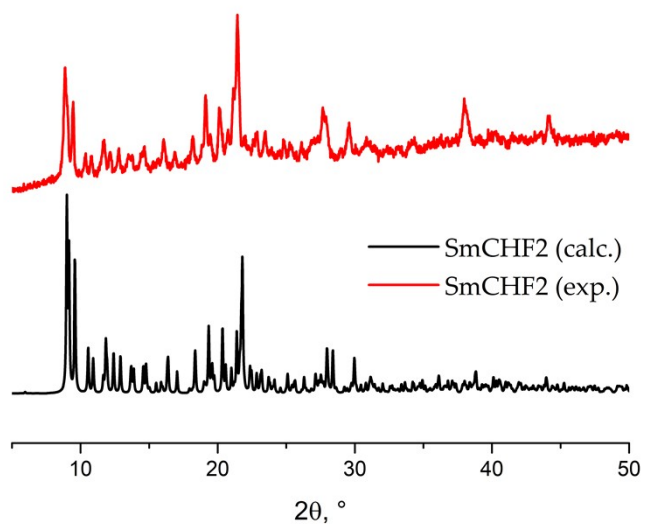

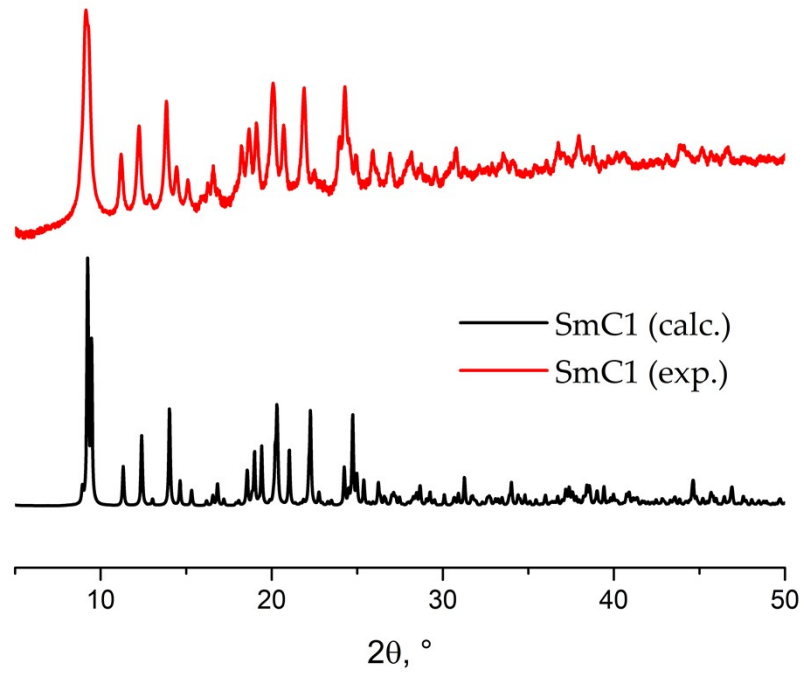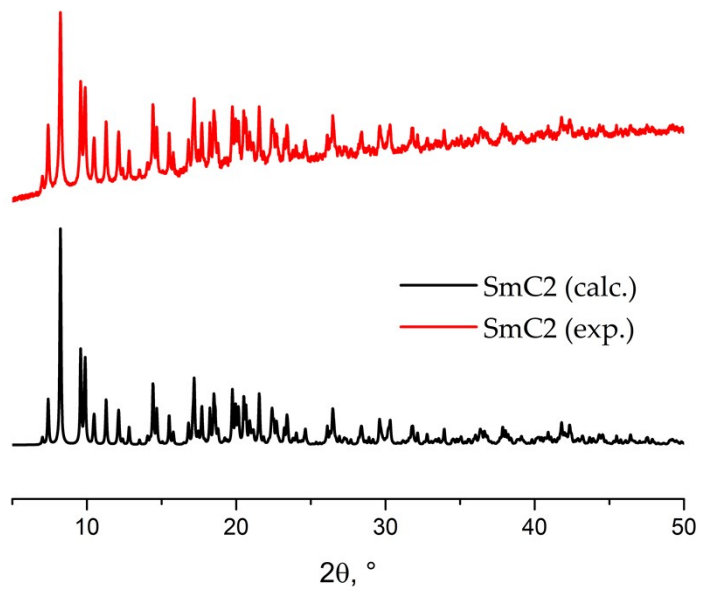

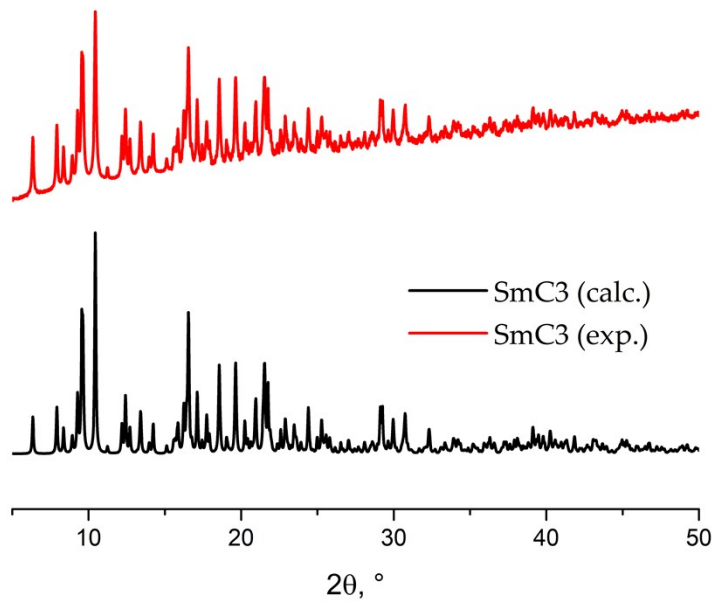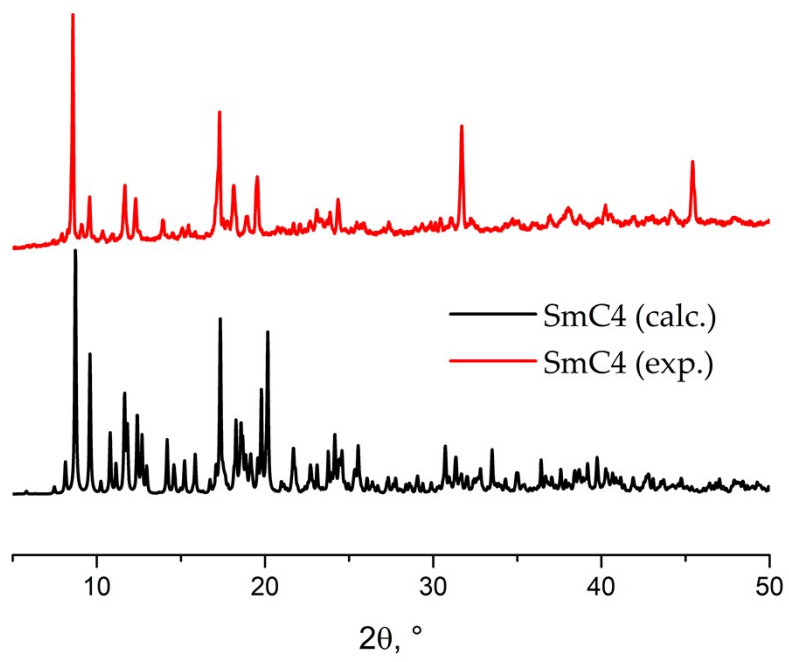

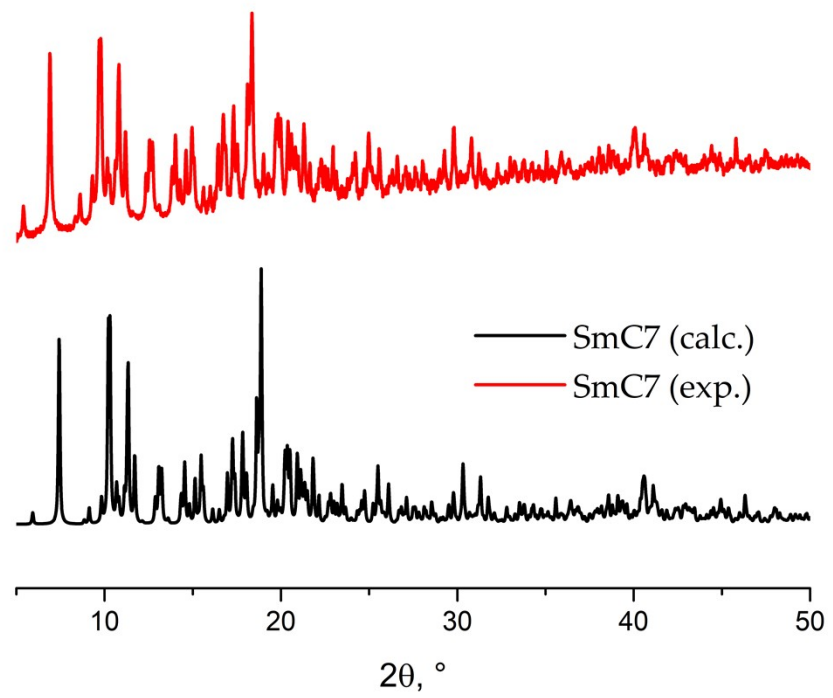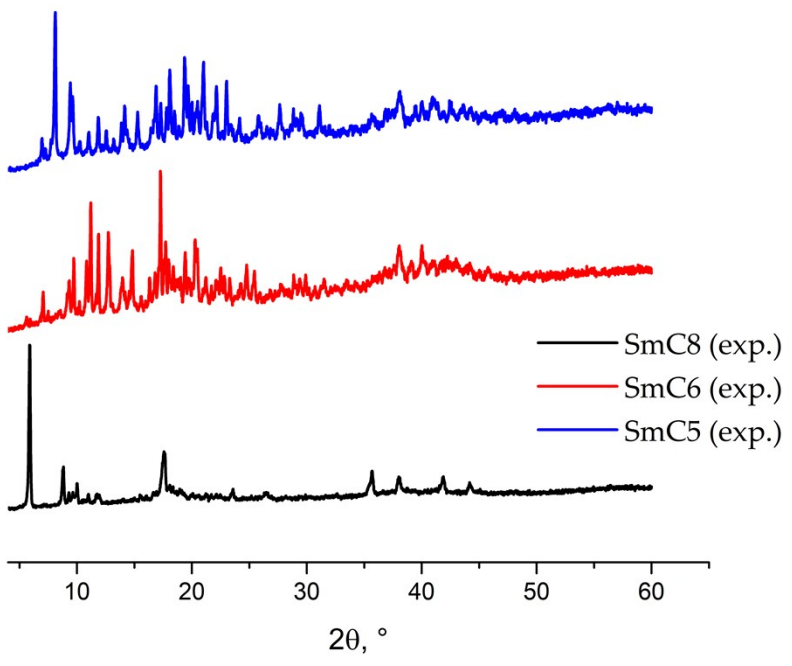

Figure S1. PXRd patterns of SmCH<sub>3</sub>, SmCHF<sub>2</sub> and SmC1-SmC8 and simulated from single crystal data for SmCH<sub>3</sub>, SmCHF<sub>2</sub>, SmC1-SmC4, SmC7.

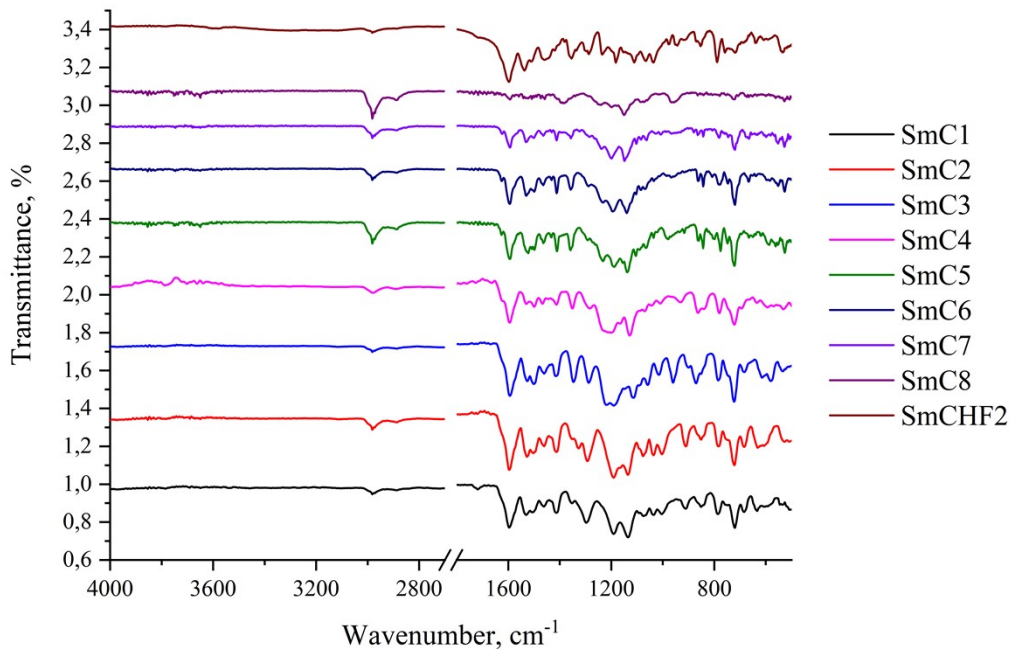

Figure S2. FTIR-spectra of the complexes *SmCHF2* and *SmC1-SmC8*.

Table S1. Selected crystal data and parameters for structure refinement of **SmC<sub>3</sub>**, **SmC<sub>4</sub>** and **SmC<sub>7</sub>**.

| Complex/Parameters                             | <b>SmC<sub>3</sub></b>                                                                          | <b>SmC<sub>4</sub></b>                                                                          | <b>SmC<sub>7</sub></b>                                                                          |
|------------------------------------------------|-------------------------------------------------------------------------------------------------|-------------------------------------------------------------------------------------------------|-------------------------------------------------------------------------------------------------|
| Empirical formula                              | C <sub>42</sub> H <sub>20</sub> F <sub>21</sub> N <sub>2</sub> O <sub>6</sub> S <sub>3</sub> Sm | C <sub>45</sub> H <sub>20</sub> F <sub>27</sub> N <sub>2</sub> O <sub>6</sub> S <sub>3</sub> Sm | C <sub>54</sub> H <sub>20</sub> F <sub>45</sub> N <sub>2</sub> O <sub>6</sub> S <sub>3</sub> Sm |
| Formula weight                                 | 1294.13                                                                                         | 1444.16                                                                                         | 1894.25                                                                                         |
| <i>T</i> (K)                                   | 100                                                                                             | 296                                                                                             | 100                                                                                             |
| Crystal system                                 | Monoclinic                                                                                      | Triclinic                                                                                       | Orthorhombic                                                                                    |
| Space group                                    | <i>P2<sub>1</sub>/n</i>                                                                         | <i>P-1</i>                                                                                      | <i>Pbca</i>                                                                                     |
| <i>a</i> (Å)                                   | 11.9132(3)                                                                                      | 11.5607(7)                                                                                      | 20.520(3)                                                                                       |
| <i>b</i> (Å)                                   | 18.4956(4)                                                                                      | 14.8128(9)                                                                                      | 18.988(3)                                                                                       |
| <i>c</i> (Å)                                   | 21.5050(5)                                                                                      | 15.9771(9)                                                                                      | 32.676(4)                                                                                       |
| $\alpha$ (°)                                   | 90                                                                                              | 100.744(2)                                                                                      | 90                                                                                              |
| $\beta$ (°)                                    | 100.7170(10)                                                                                    | 101.341(2)                                                                                      | 90                                                                                              |
| $\gamma$ (°)                                   | 90                                                                                              | 103.867(2)                                                                                      | 90                                                                                              |
| <i>V</i> (Å <sup>3</sup> )                     | 4655.80(19)                                                                                     | 2524.8(3)                                                                                       | 12732(3)                                                                                        |
| <i>Z</i>                                       | 4                                                                                               | 2                                                                                               | 8                                                                                               |
| <i>D</i> <sub>calc</sub> (g·cm <sup>-3</sup> ) | 1.846                                                                                           | 1.900                                                                                           | 1.976                                                                                           |
| $\mu$ (mm <sup>-1</sup> )                      | 1.530                                                                                           | 1.438                                                                                           | 1.205                                                                                           |
| $\theta$ range (°)                             | 2.06-27.10                                                                                      | 2.36-25.00                                                                                      | 1.92-24.71                                                                                      |
| <i>F</i> (000)                                 | 2532                                                                                            | 1410                                                                                            | 7368                                                                                            |
| Number of parameters                           | 862                                                                                             | 739                                                                                             | 1064                                                                                            |

|                                   |        |        |        |
|-----------------------------------|--------|--------|--------|
| Reflections collected             | 45016  | 30780  | 40177  |
| Unique reflections                | 10268  | 8881   | 10589  |
| Reflections with $I > 2\sigma(I)$ | 7854   | 7070   | 8143   |
| $R_{\text{int}}$                  | 0.0496 | 0.0736 | 0.1022 |
| $GooF$                            | 1.031  | 1.082  | 1.135  |
| $R_1(I > 2\sigma(I))$             | 0.0541 | 0.0622 | 0.1238 |
| $wR_2(I > 2\sigma(I))$            | 0.1296 | 0.1039 | 0.2609 |

**Table S2.** Selected bond lengths, the shortest interatomic distances (Å) and angles (°) in **SmC<sub>3</sub>**, **SmC<sub>4</sub>** and **SmC<sub>7</sub>**.

| Complex/Parameters    | SmC <sub>3</sub>    | SmC <sub>4</sub>    | SmC <sub>7</sub>     |
|-----------------------|---------------------|---------------------|----------------------|
| Sm–O, Å               | 2.327(13)–2.390(4)  | 2.360(5)–2.418(4)   | 2.349(9)–2.391(9)    |
| Sm–N, Å               | 2.599(6), 2.613(5)  | 2.593(6), 2.602(5)  | 2.578(10), 2.582(10) |
| C–O, Å                | 1.251(7)–1.269(8)   | 1.256(9)–1.275(9)   | 1.249(15)–1.287(16)  |
| C–C(diketon), Å       | 1.346(13)–1.471(13) | 1.371(9)–1.422(8)   | 1.380(18)–1.41(2)    |
| Sm...Sm, Å            | 9.948(3)            | 9.321(1)            | 10.413(2)            |
| O–Sm–O(chelate), deg. | 70.5(2)–72.9(3)     | 70.62(16)–70.91(15) | 70.0(3)–70.8(3)      |
| N–Sm–N, deg.          | 63.0(2)             | 63.3(2)             | 62.8(3)              |

**Table S3.** Selected Continuous Shape Measures (CShM) values for the potential coordination polyhedra of Sm in the structure of **SmC<sub>3</sub>**, **SmC<sub>4</sub>** and **SmC<sub>7</sub>**

| Complex/Geometry                             | SmC <sub>3</sub> | SmC <sub>4</sub> | SmC <sub>7</sub> |
|----------------------------------------------|------------------|------------------|------------------|
| O <sub>h</sub> , cube                        | 9.997            | 10.595           | 8.845            |
| D <sub>4d</sub> , square antiprism           | 2.167            | 1.314            | 1.922            |
| D <sub>2d</sub> , triangular dodecahedron    | 0.819            | 1.485            | 0.624            |
| C <sub>2v</sub> , biaugmented trigonal prism | 2.499            | 2.932            | 2.896            |
| C <sub>2v</sub> , biaugmented trigonal prism | 1.938            | 2.293            | 2.182            |
| D <sub>2d</sub> , snub diphenoid             | 3.260            | 4.257            | 3.500            |
| T <sub>d</sub> , triakis tetrahedron         | 10.658           | 11.427           | 9.604            |

**Table S4.** Selected parameters for the C–H...A interactions in **SmC<sub>3</sub>**, **SmC<sub>4</sub>** and **SmC<sub>7</sub>**.

| Interaction                        | D–H, Å | H...A, Å | D...A, Å  | D–H–A, deg. |
|------------------------------------|--------|----------|-----------|-------------|
| <b>SmC<sub>3</sub></b>             |        |          |           |             |
| C22–H22...S3'                      | 0.95   | 2.38     | 2.729(10) | 110         |
| C25–H25...F16 (-1+x,y,z)           | 0.95   | 2.46     | 3.22(2)   | 136         |
| C25–H25...F1A (1/2-x,-1/2+y,3/2-z) | 0.95   | 2.51     | 3.280(15) | 139         |
| C26–H26...F2 (1/2-x,-1/2+y,3/2-z)  | 0.95   | 2.37     | 3.187(16) | 136         |
| C32–H32...F4 (1-x,1-y,1-z)         | 0.95   | 2.53     | 3.100(11) | 135         |
| C36–H36...O6                       | 0.95   | 2.38     | 3.050(10) | 127         |
| C42–H42...F3 (3/2-x,1/2+y,3/2-z)   | 0.95   | 2.31     | 3.212(13) | 159         |
| <b>SmC<sub>4</sub></b>             |        |          |           |             |
| C16–H16...O5 (1-x,2-y,1-z)         | 0.95   | 2.60     | 3.330(9)  | 136         |

|                            |      |      |           |     |
|----------------------------|------|------|-----------|-----|
| C34–H34…O6                 | 0.95 | 2.57 | 3.155(10) | 121 |
| C44–H44…F9 (-x,1-y,-z)     | 0.95 | 2.52 | 3.428(10) | 167 |
| <b>SmC<sub>7</sub></b>     |      |      |           |     |
| C20–H20…F19' (1-x,1-y,1-z) | 0.95 | 2.51 | 3.26(3)   | 135 |
| C34–H34…O1 (3/2-x,1/2+y,z) | 0.95 | 2.52 | 3.331(17) | 144 |

**Table S5.** Selected parameters for the S…F and C-F…F-C intermolecular interactions in **SmC<sub>3</sub>**, **SmC<sub>4</sub>** and **SmC<sub>7</sub>**.

| X…Y                    | Symmetry             | <i>d</i> , Å |
|------------------------|----------------------|--------------|
| <b>SmC<sub>3</sub></b> |                      |              |
| S3…F9B                 | -1+x, y, z           | 2.886(16)    |
| F1A…F9A                | 3/2-x, 1/2+y, 3/2-z  | 2.963(19)    |
| F1A…F9                 | -1/2+x, 1/2-y, 1/2+z | 3.026(15)    |
| F2A…F4A                | -1/2+x, 1/2-y, 1/2+z | 2.803(12)    |
| F3B…F4                 | -1/2+x, 1/2-y, 1/2+z | 2.952(11)    |
| F5…F6                  | 2-x, 1-y, 1-z        | 3.087(17)    |
| F6…F6                  | 2-x, 1-y, 1-z        | 2.965(15)    |
| F9…F9A                 | 2-x, -y, 1-z         | 2.95(3)      |
| F1…H37                 | -1+x, y, z           | 2.77         |
| <b>SmC<sub>4</sub></b> |                      |              |
| S2…F5                  | 1-x, 2-y, 1-z        | 3.402(5)     |
| F1…F11A                | 1-x, 1-y, -z         | 3.075(7)     |
| F3A…F6A                | x, -1+y, z           | 3.117(7)     |
| F3A…F8A                | x, -1+y, z           | 3.120(7)     |
| F4…F11                 | -x, 1-y, -z          | 3.066(7)     |
| F4A…F12                | -x, 1-y, -z          | 2.904(7)     |
| F4B…F10                | -x, 1-y, -z          | 3.089(7)     |
| F4B…F11                | -x, 1-y, -z          | 3.109(7)     |
| F5…F12A                | 1-x, 2-y, -z         | 3.029(7)     |
| F5A…F12A               | 1-x, 2-y, -z         | 3.090(6)     |
| F6…F12B                | 1-x, 2-y, -z         | 3.074(7)     |
| F8…F8                  | -x, 2-y, -z          | 2.996(9)     |
| F8A…F10A               | -1+x, y, z           | 3.003(7)     |
| F8B…F10A               | -1+x, y, z           | 2.981(8)     |
| F12…F12                | 1-x, 2-y, -z         | 3.016(6)     |
| <b>SmC<sub>7</sub></b> |                      |              |
| S1…F21A                | x, 1/2-y, 1/2+z      | 3.139(18)    |
| S3'…F7A                | x, 1/2-y, 1/2+z      | 3.236(14)    |
| F1A…F7C                | 1-x, -y, 1-z         | 2.799(16)    |
| F3A…F13A               | x, 1/2-y, -1/2+z     | 2.689(17)    |
| F3B…F10B               | 1-x, -1/2+y, 3/2-z   | 2.644(12)    |
| F3B…F7C                | 1-x, -y, 1-z         | 3.009(16)    |
| F4…F7B                 | 3/2-x, 1/2+y, z      | 2.86(3)      |





|                       |                                                                                        |                                                             |                                  |                                           |                                           |                                                    |                                           |                                           |                                  |                                                    |
|-----------------------|----------------------------------------------------------------------------------------|-------------------------------------------------------------|----------------------------------|-------------------------------------------|-------------------------------------------|----------------------------------------------------|-------------------------------------------|-------------------------------------------|----------------------------------|----------------------------------------------------|
|                       | 17387<br>17315                                                                         |                                                             |                                  |                                           |                                           |                                                    |                                           |                                           |                                  |                                                    |
| ${}^6\text{H}_{7/2}$  | 16633<br>16520<br>16445<br>16376<br>16347<br>16280                                     | 16636<br>16532<br>16500<br>16346<br>16160<br>16102          | 16641<br>16548<br>16478<br>16359 | 16649<br>16547<br>16404                   | 16654<br>16533<br>16454<br>16360          | 16656<br>16557<br>16502<br>16419                   | 16633<br>16550<br>16493<br>16433          | 16625<br>16535<br>16480<br>16381          | 16638<br>16552<br>16393<br>16294 | 16633<br>16556<br>16496<br>16423<br>16390          |
| ${}^6\text{H}_{9/2}$  | 15430<br>15407<br>15361<br>15334<br>15296<br>15255<br>15233<br>15172<br>15132<br>15067 | 15421<br>15354<br>15279<br>15145                            | 15431<br>15365<br>15272<br>15169 | 15650<br>15436<br>15373<br>15309<br>15209 | 15433<br>15377<br>15276<br>15162          | 15445<br>15386<br>15317<br>15272<br>15242<br>15209 | 15427<br>15370<br>15322<br>15281<br>15244 | 15420<br>15351<br>15302<br>15263<br>15190 | 15434<br>15370<br>15290<br>15194 | 15496<br>15425<br>15371<br>15319<br>15276<br>15205 |
| ${}^6\text{H}_{11/2}$ | 14110<br>14069<br>13996<br>13897                                                       | 14369<br>14237<br>14114<br>14054<br>14011<br>13964<br>13817 | 14120<br>14060<br>13992<br>13825 | 14124<br>14004                            | 14125<br>14072<br>14012<br>13950<br>13822 | 14124<br>14075<br>14045<br>13987<br>13915          | 14099<br>14032<br>13987                   | 14103<br>14053<br>13975<br>13870          | 14111<br>14003<br>13876          | 14107<br>13998<br>13900                            |

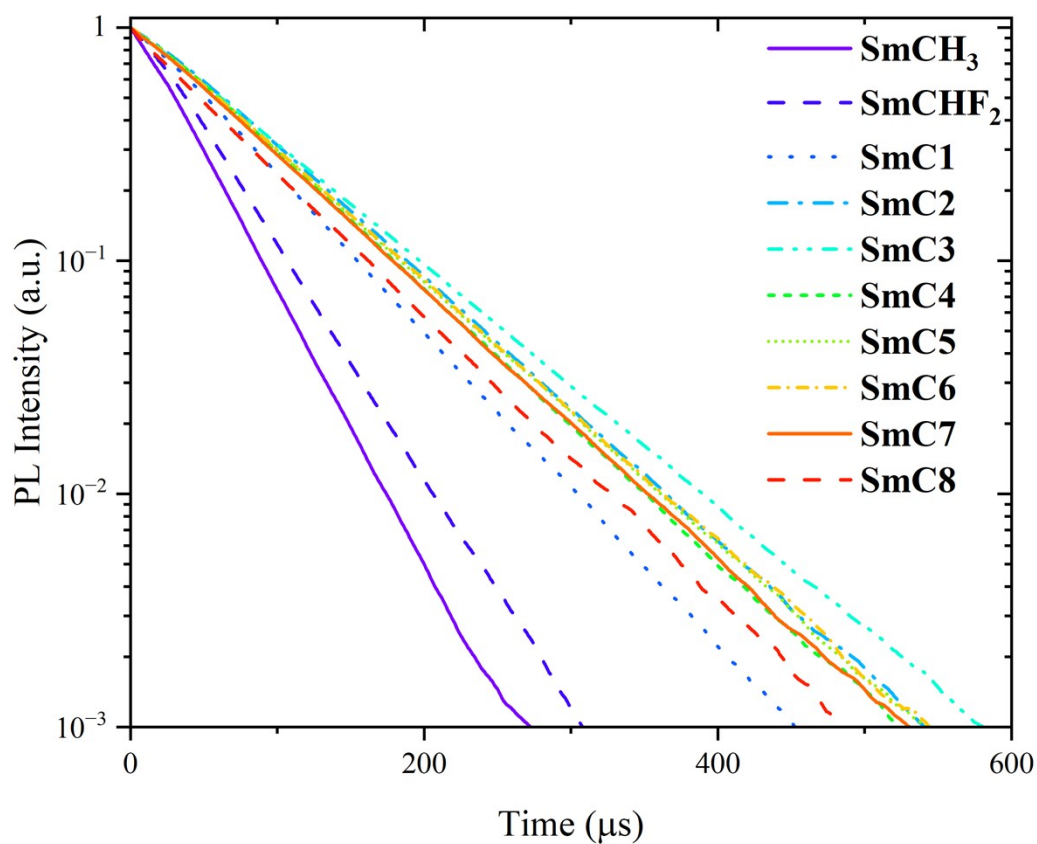

Figure S4. Photoluminescence decay curves for complexes registered at 648 nm wavelength with excitation at 375 nm. Experiments performed at 300 K.

Table S7. CIE coordinates for samarium complexes.

| Complex                  | (X,Y)      |            |
|--------------------------|------------|------------|
|                          | 300 K      | 77 K       |
| <b>SmCH<sub>3</sub></b>  | 0.64, 0.36 | 0.65, 0.34 |
| <b>SmCHF<sub>2</sub></b> | 0.64, 0.36 | 0.65, 0.34 |
| <b>SmC<sub>1</sub></b>   | 0.64, 0.36 | 0.65, 0.35 |
| <b>SmC<sub>2</sub></b>   | 0.63, 0.36 | 0.65, 0.35 |
| <b>SmC<sub>3</sub></b>   | 0.64, 0.36 | 0.66, 0.34 |
| <b>SmC<sub>4</sub></b>   | 0.65, 0.36 | 0.66, 0.34 |
| <b>SmC<sub>5</sub></b>   | 0.63, 0.37 | 0.65, 0.35 |
| <b>SmC<sub>6</sub></b>   | 0.64, 0.37 | 0.65, 0.35 |
| <b>SmC<sub>7</sub></b>   | 0.64, 0.36 | 0.65, 0.35 |
| <b>SmC<sub>8</sub></b>   | 0.64, 0.36 | 0.63, 0.37 |

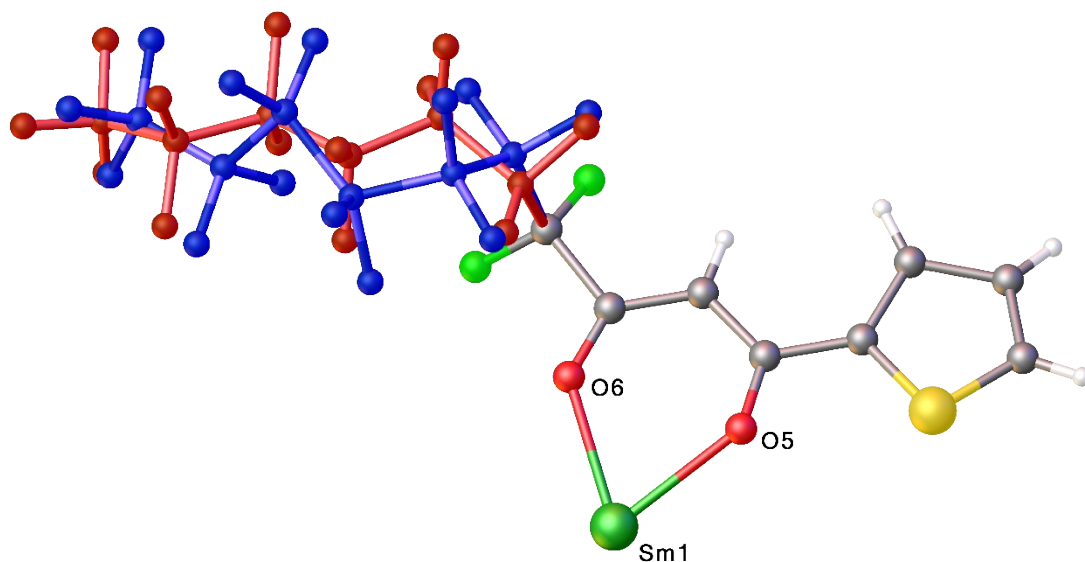

Figure S5. View of the "bending" positional disorder of perfluorinated alkyl chain in the crystal structure of SmC7. Red- and blue-colored atoms represent the occupied sites of carbon and fluorine atoms, fractions are 50% each. All thermal ellipsoids of atomic displacement are omitted for clarity.

Table S8. Comparison of photoluminescence decay times of the investigated complexes with reported in literature in recent years.

| Complex                                       | $\tau_{\text{obs}}$ , $\mu\text{s}$ |
|-----------------------------------------------|-------------------------------------|
| <b>SmCH<sub>3</sub></b>                       | 38±0.02                             |
| <b>SmCHF<sub>2</sub></b>                      | 46±0.05                             |
| <b>SmC1</b>                                   | 68±0.06                             |
| <b>SmC<sub>2</sub></b>                        | 83±0.03                             |
| <b>SmC<sub>3</sub></b>                        | 85±0.06                             |
| <b>SmC<sub>4</sub></b>                        | 79±0.03                             |
| <b>SmC<sub>5</sub></b>                        | 80±0.07                             |
| <b>SmC<sub>6</sub></b>                        | 80±0.08                             |
| <b>SmC<sub>7</sub></b>                        | 78±0.06                             |
| <b>SmC<sub>8</sub></b>                        | 69±0.08                             |
| <b>Sm(hfaa)<sub>3</sub>(impy)<sub>2</sub></b> | 36[1]                               |
| <b>Sm(hfaa)<sub>3</sub>(pz)<sub>2</sub></b>   | 39[2]                               |
| <b>Sm(hfaa)<sub>3</sub>(TPPO)<sub>2</sub></b> | 97[3]                               |
| <b>Sm(hfpd)<sub>3</sub>(prehen)</b>           | 53[4]                               |
| <b>Sm(hfpd)<sub>3</sub>(TOPO)<sub>2</sub></b> | 26[4]                               |
| <b>Sm(L3)bipy</b>                             | 45.3[5]                             |
| <b>Sm(L3)phen</b>                             | 41.1[5]                             |

- [1] Z. Ahmed, W. Ahmed Dar, and K. Iftikhar, 'Synthesis and luminescence study of a highly volatile Sm(III) complex', *Inorganica Chim. Acta*, vol. 392, pp. 446–453, Sep. 2012, doi: 10.1016/j.ica.2012.05.025.
- [2] Z. Ahmed, W. Ahmed Dar, and K. Iftikhar, 'Synthesis and luminescence study of a highly volatile Sm(III) complex', *Inorganica Chim. Acta*, vol. 392, pp. 446–453, Sep. 2012, doi: 10.1016/j.ica.2012.05.025.
- [3] H. Kawai, C. Zhao, S. Tsuruoka, T. Yoshida, Y. Hasegawa, and T. Kawai, 'Emission properties of Sm(III) complexes having remarkably deep-red emission band', *J. Alloys Compd.*, vol. 488, no. 2, pp. 612–614, Dec. 2009, doi: 10.1016/j.jallcom.2008.09.091.
- [4] S. Malik *et al.*, 'Exploring the role of neutral ligands in modulating the photoluminescence of samarium(III) complexes with 1,1,1,5,5,5-hexafluoro-2,4-pentanedione', *Luminescence*, vol. 39, no. 7, Jul. 2024, doi: 10.1002/bio.4810.
- [5] V. S. Sizov *et al.*, 'Effect of ancillary ligands on visible and NIR luminescence of Sm<sup>3+</sup>  $\beta$ -diketonate complexes', *Spectrochim. Acta. A. Mol. Biomol. Spectrosc.*, vol. 225, p. 117503, Jan. 2020, doi: 10.1016/j.saa.2019.117503.
